# Supplementary material
Source: publisher figshare collection journal article supplement (https://gsajournals.figshare.com/ndownloader/files/36174930)
Supplement: Supplementary file 1 [file 36174930]

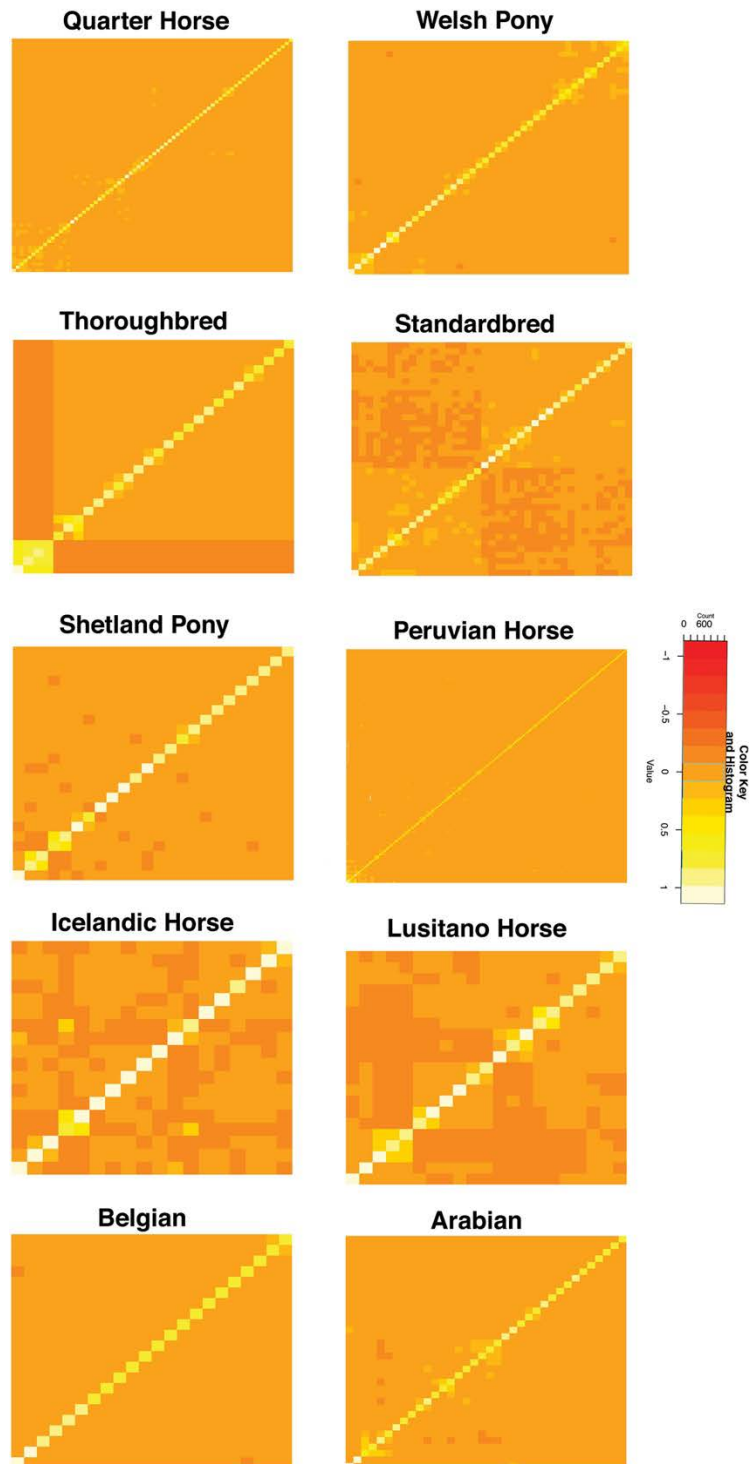

**Figure S1.** Genomic relationship matrix heatmap plotted for each breed of horse in the study. The colors represent the strength of the relationship between individual horses within a breed.

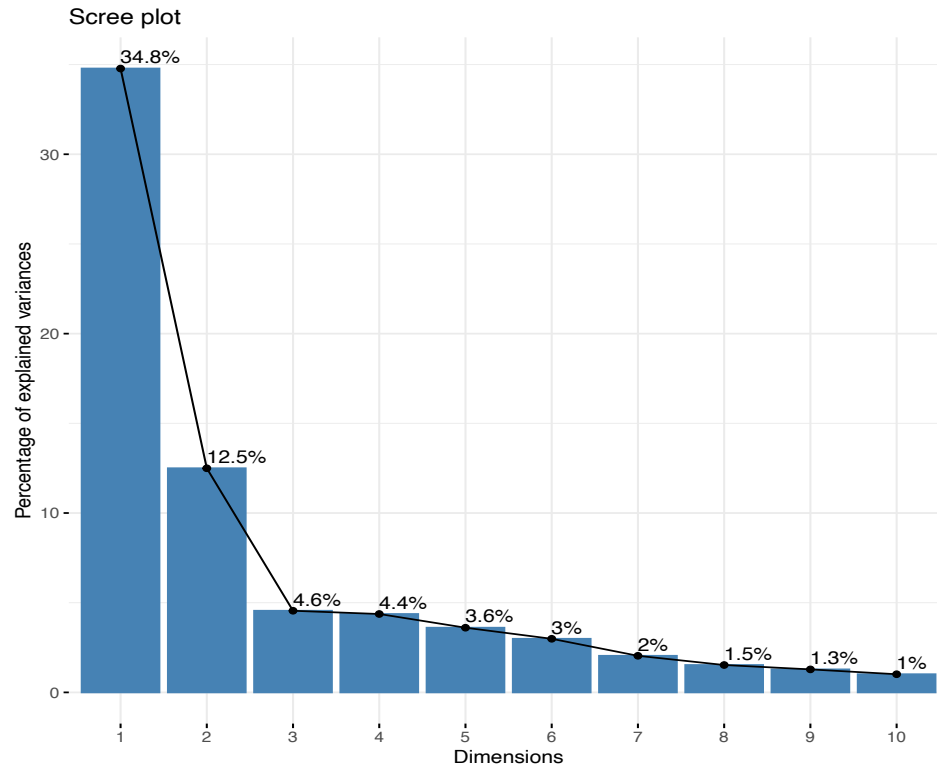

**Figure S2.** The plot shows the variance explained by the first ten principal components. The solid line represents the variance reduction trend over all ten components. The analysis used all SNPs included in the GWAS.

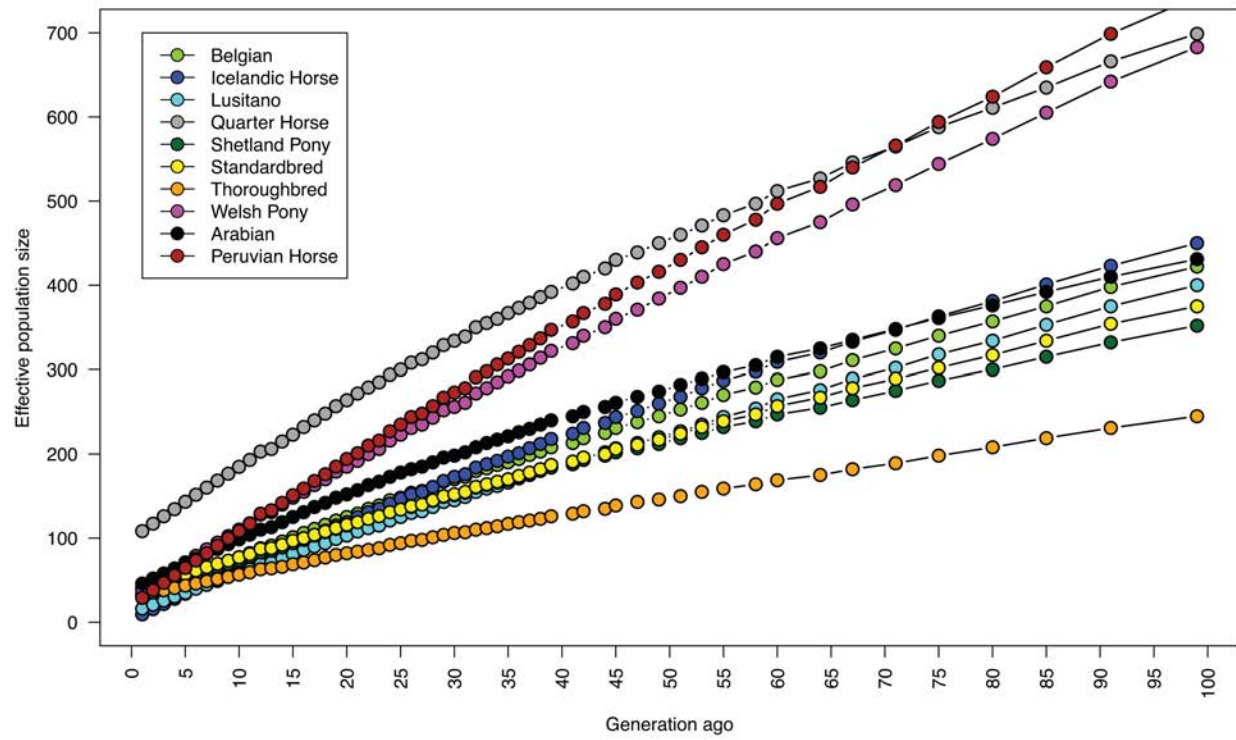

**Figure S3A.** Estimated effective population sizes ( $N_e$ ) in ten horse populations over 100 generation.

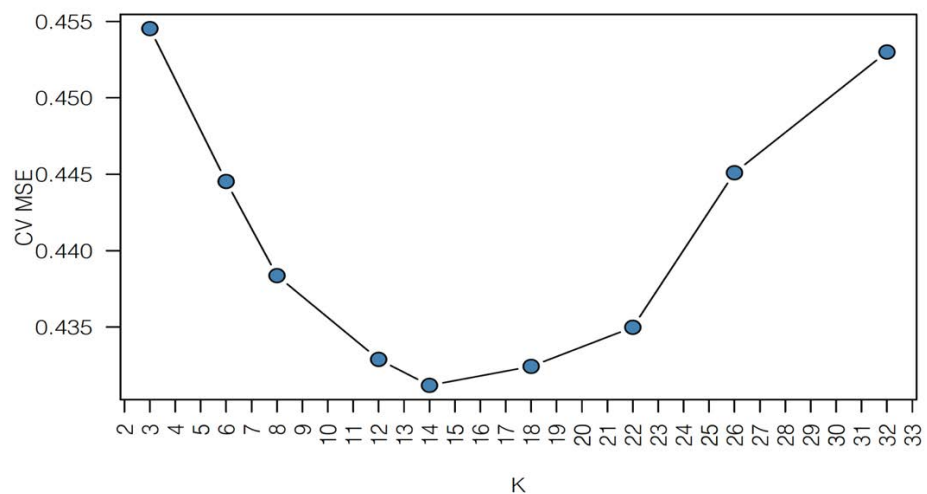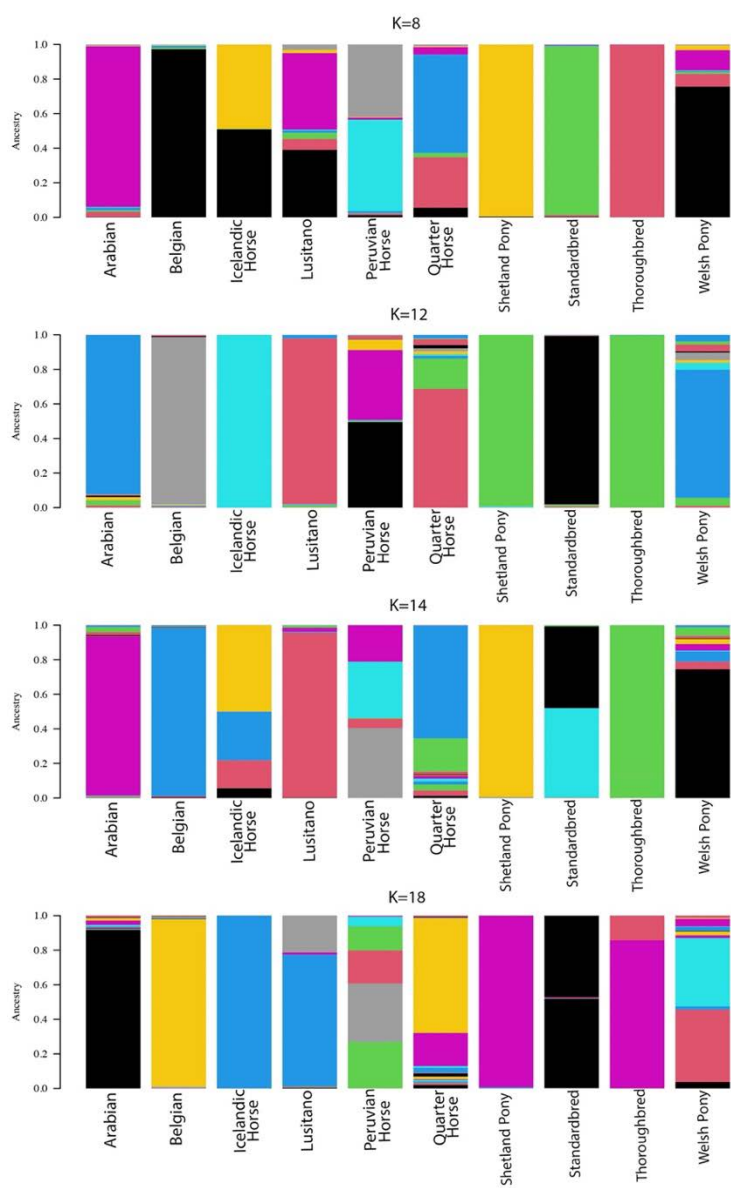

**Figure S3B.** Admixture output for the four lowest mean squared error (MSE) values obtained by cross validation over  $K = 8, 12, 14,$  and  $18$ . The lowest value was at  $K=14$ . Ancestry admixture proportion within each breed is represented by different colors. In all these scenarios, the Standardbred, Peruvian Horse, Lusitano, and Arabian showed some degree of ancestral gene flow based on admixture analysis.

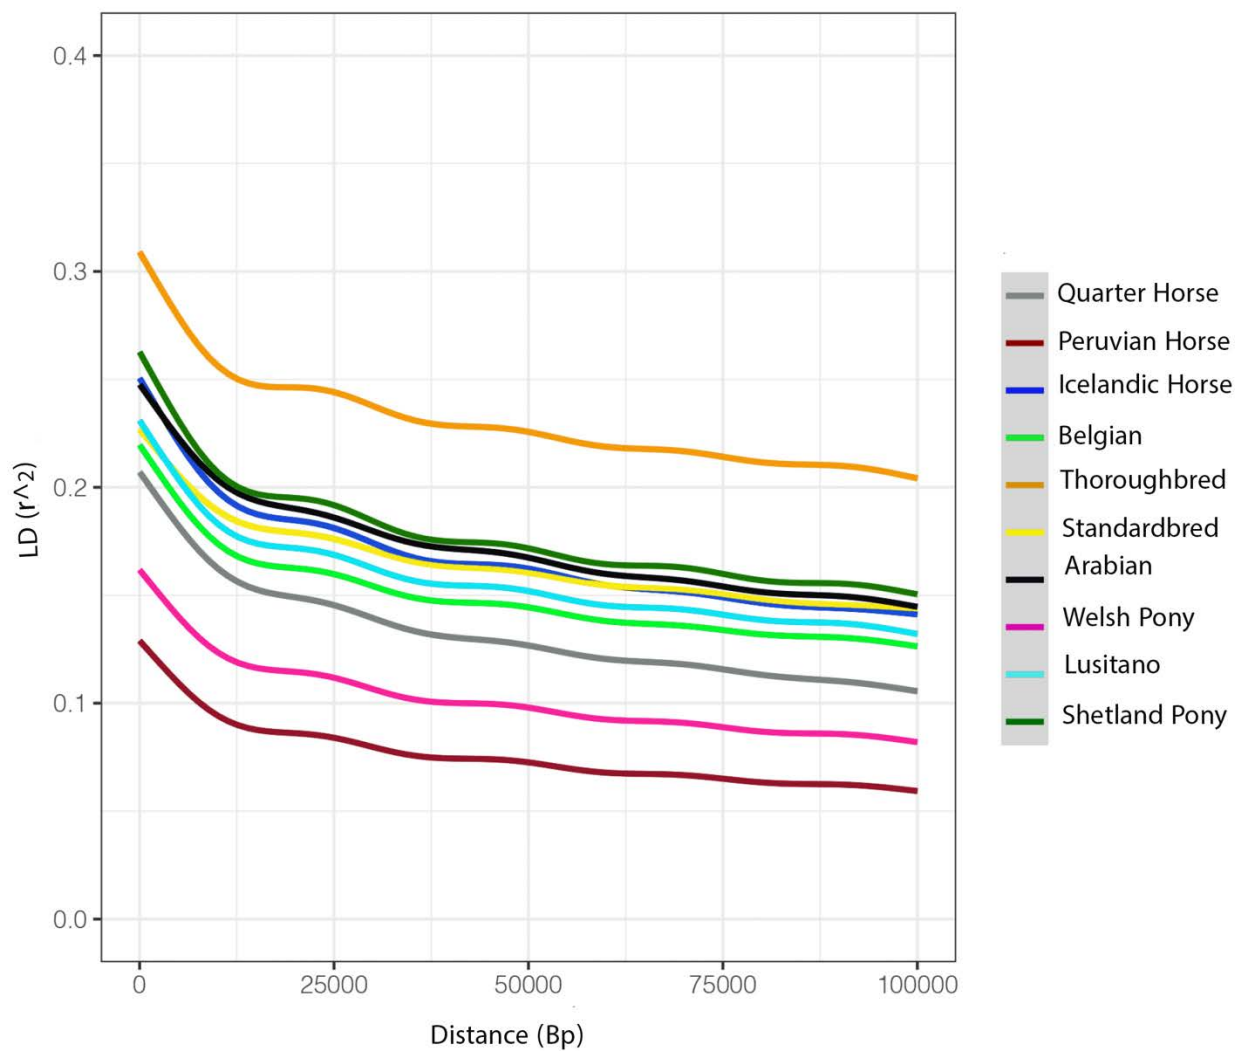

**Figure S4.** The decay of LD by distance in ten horse breeds plotted for marker distances up to 100 kb. The y-axis shows distribution of average pairwise  $r^2$  values.

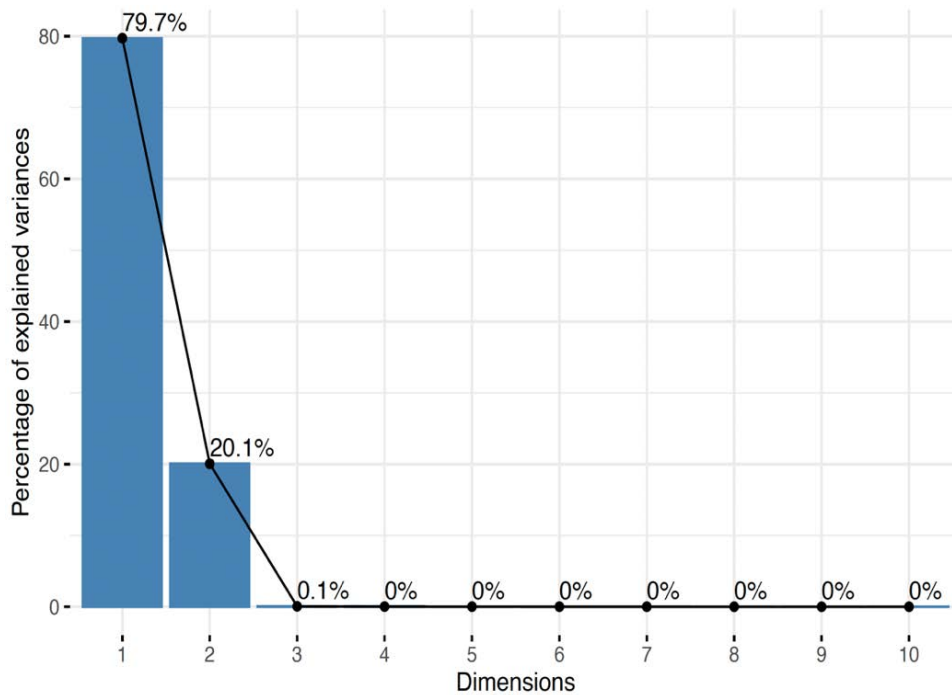

**Figure S5.** The plot shows the variance explained by the first ten principal components. The solid line represents the variance reduction trend over all ten components. The analysis used only the DSLD-associated significant GWAS SNPs.

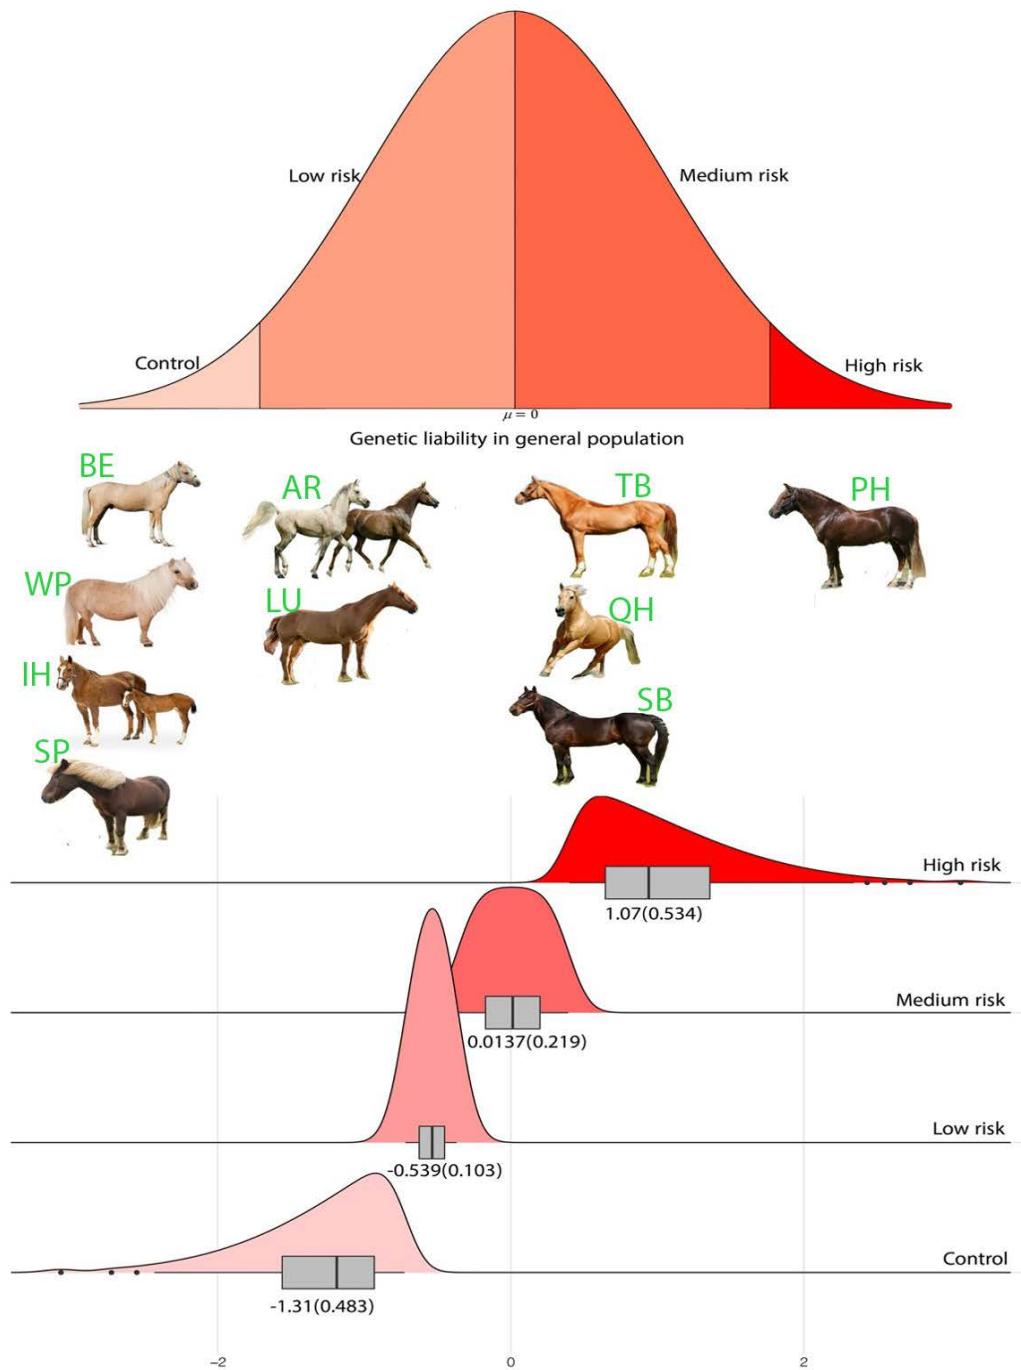

**Figure S6.** The hypothetical genetic distribution of liabilities across genetic risk groups. Control included the Belgian (BE), Icelandic Horse (IH), Shetland Pony (SP) and Welsh Pony (WP) breeds; low risk included the Lusitano (LU) and Arabian (AR) breeds; medium risk included the Standardbred (SB), Thoroughbred (TB), Quarter Horse (QH) breeds, and high risk consisted of the Peruvian Horse (PH). The bottom plot showed distributions of liabilities for each risk group separately estimated by a Bayesian linear mixed model. The numbers are mean (standard deviation) for each distribution.
